# Supplementary material for: Rational construction of a CNTs@VO2 nanosheets modified separator for enhancing the performance of lithium–sulfur batteries
Source: Royal Society of Chemistry journal article supplement (doi:10.1039/d2dt00421f), 2022-01-01
Supplement: d2dt00421f1.pdf [file d2dt00421f1.pdf]

### Supporting information

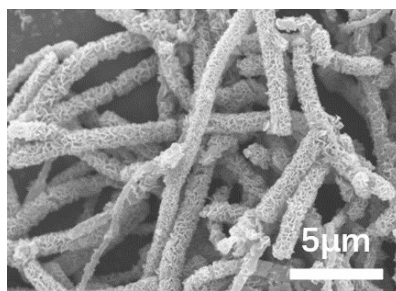

**Figure S1.** SEM of the V-precursor.

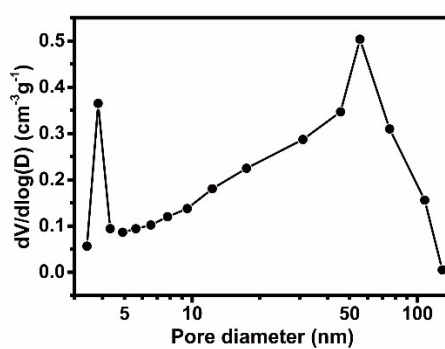

**Figure S2.** Pore size distribution of CNTs@VO<sub>2</sub>.

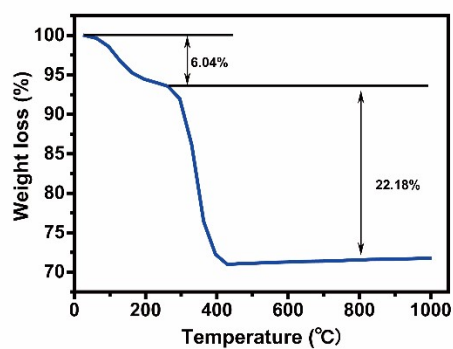

**Figure S3.** TGA test of CNTs@VO<sub>2</sub>.

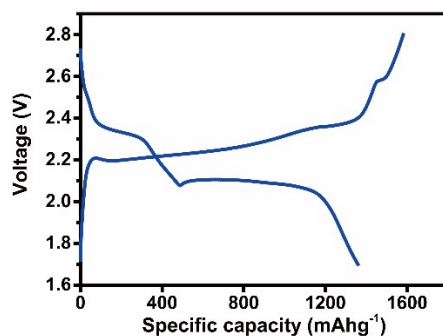

**Figure S4.** Charge-discharge profile of CNTs@VO<sub>2</sub> cathode at 0.2C.

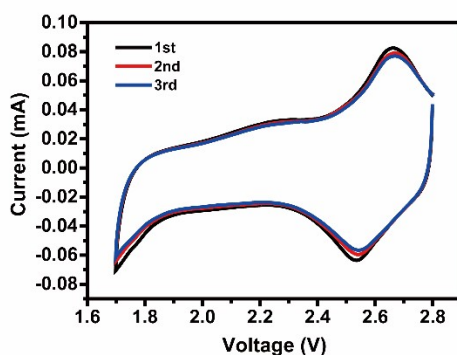

**Figure S5.** CV curves of the initial three cycles of bare CNTs@VO<sub>2</sub> cathode at 0.1 mV s<sup>-1</sup>.

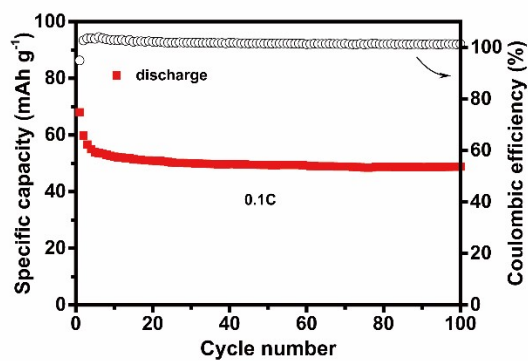

**Figure S6.** Cycling performance of bare CNTs@VO<sub>2</sub> cathode at a current density of 0.1 C for 100 cycles.

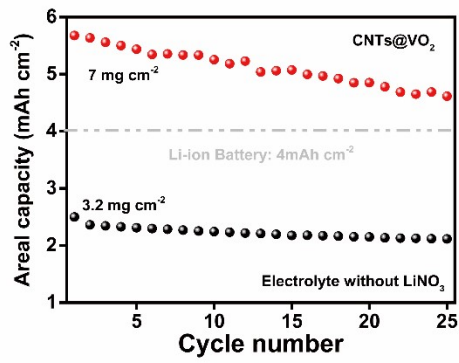

**Figure S7.** High loading electrodes with the electrolytes without lithium nitrate additions.

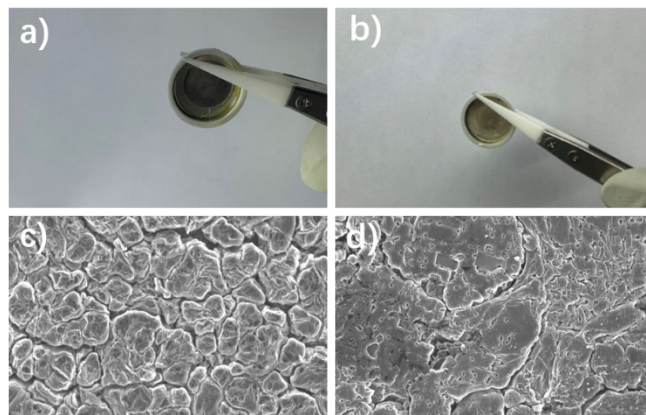

**Fig S8.** (a) the digital photo of the Li anode after cycling with CNTs modified separator. (b) the digital photo of the Li anode after cycling with CNTs@VO<sub>2</sub> modified separator. (c) SEM of the Li anode after cycling with CNTs modified separator. (d) SEM of the Li anode after cycling with CNTs@VO<sub>2</sub> modified separator.

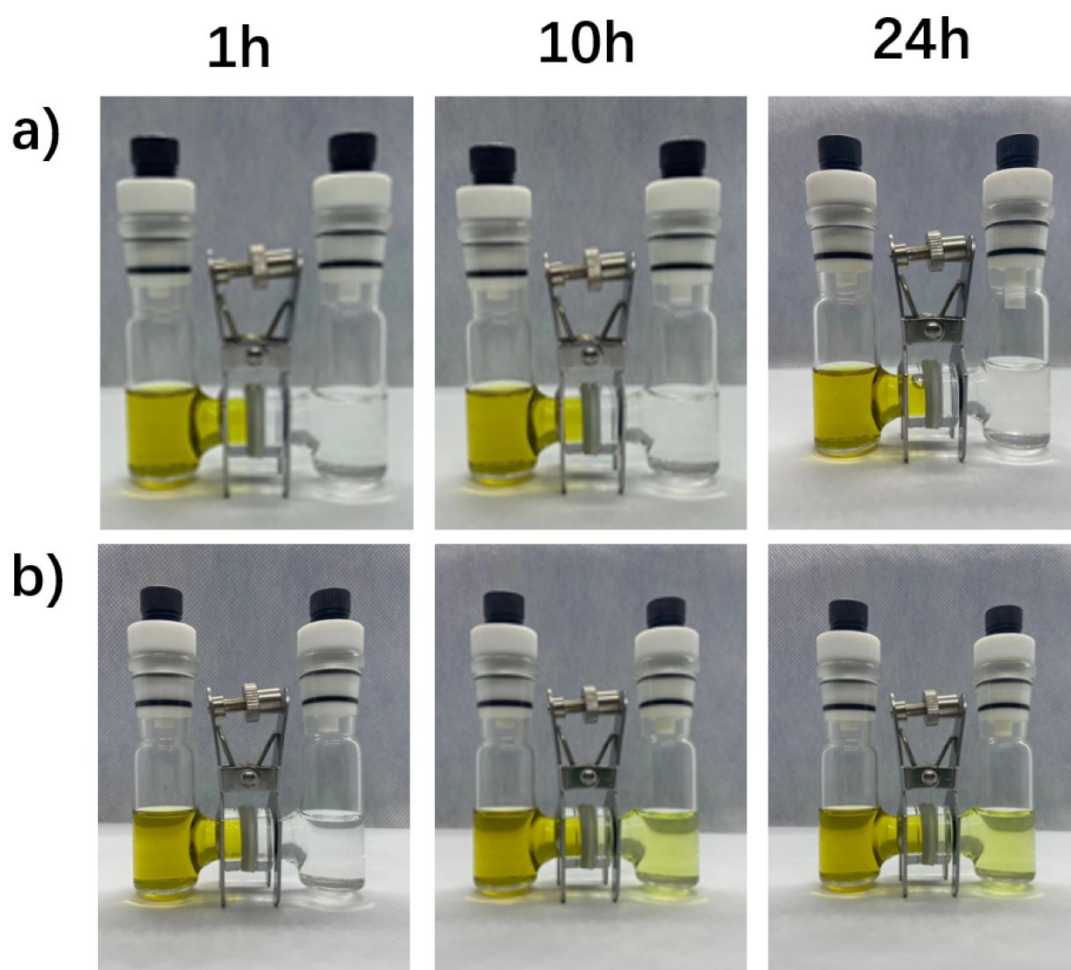

**Figure S9.** Photographs of proton exchanger with  $\text{Li}_2\text{S}_6$  in DOL/DME solution and pure DOL/DME solvent in the left and right chambers, respectively. **(a)**  $\text{CNTs@VO}_2$  modified separator. **(b)** PP separator.

| Sample                    | Sulfur content (wt%) | Rate (C) | Initial capacity ( $\text{mAh g}^{-1}$ ) | Areal capacity ( $\text{mAh cm}^{-2}$ ) | Capacity decay (%) | Ref       |
|---------------------------|----------------------|----------|------------------------------------------|-----------------------------------------|--------------------|-----------|
| $\text{VO}_2/\text{rGo}$  | 76.1                 | 0.2      | 1416                                     | 3.35                                    | 0.06               | 1         |
| $\text{VO}_2$ HSs         | 78                   | 0.1      | 1084                                     | 1.5                                     | 0.15               | 2         |
| $\text{VO}_2/\text{NCNT}$ | 75                   | 0.2      | 1200                                     | 4.8                                     | 0.09               | 3         |
| $\text{VO}_2/\text{rGo}$  | 70                   | 0.2      | 1200                                     | 2.5                                     | 0.07               | 4         |
| $\text{VO}_2/\text{rGo}$  | 76                   | 0.2      | 1180                                     | 2.53                                    | 0.12               | 5         |
| $\text{VO}_2@\text{NVO}$  | 80                   | 0.2      | 1380                                     | 4.5                                     | 0.08               | 6         |
| $\text{VO}_2@\text{CNTs}$ | 78                   | 0.2      | 1397                                     | 5.4                                     | 0.08               | This work |

**Table S1.** Comparison of Li-S battery performance between  $\text{CNTs@VO}_2$  and other works.

1. S. Li, Y. Cen, Q. Xiang, M. K. Aslam, B. Hu, W. Li, Y. Tang, Q. Yu, Y. Liu and C. Chen, *J Mater Chem A*, 2019, DOI: 10.1039/c8ta10422k.
2. L. Zhou, L. Yao, S. Li, J. Zai, S. Li, Q. He, K. He, X. Li, D. Wang and X. Qian, *J Mater Chem A*, 2019, **7**, 3618-3623.
3. S. Wang, J. Liao, X. Yang, J. Liang, Q. Sun, J. Liang, F. Zhao, A. Koo, F. Kong, Y. Yao, X. Gao, M. Wu, S.-Z. Yang, R. Li and X. Sun, *Nano Energy*, 2019, **57**, 230-240.
4. J. Xu, T. Li, W. Zhang, W. Wu, Y. Jin, X. Zhang, D. Su and G. Wang, *J Alloy Compd*, 2019, **804**, 549-553.
5. Z. Song, X. Lu, Q. Hu, D. Lin and Q. Zheng, *Dalton Trans*, 2020, **49**, 14921-14930.
6. Z. Yu, W. Lv, Q. Lin, X. Huang and Y. Yang, *Acs Nano*, 2021, **15**, 16878-16886.
